# Supplementary material
Source: ML conference proceedings conference paper supplement (https://openreview.net/forum?id=90u-dEHHykS)

Self-Correcting

Hawkes (dense)

Hawkes (block-diagonal)

Hawkes (block-diagonal)

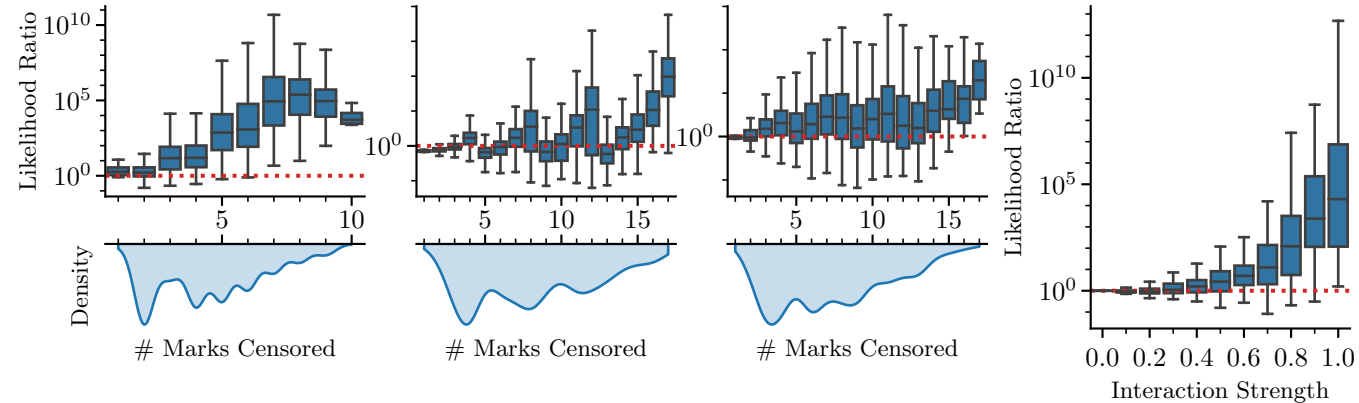

Supplement: supplementary_material [file attachment]

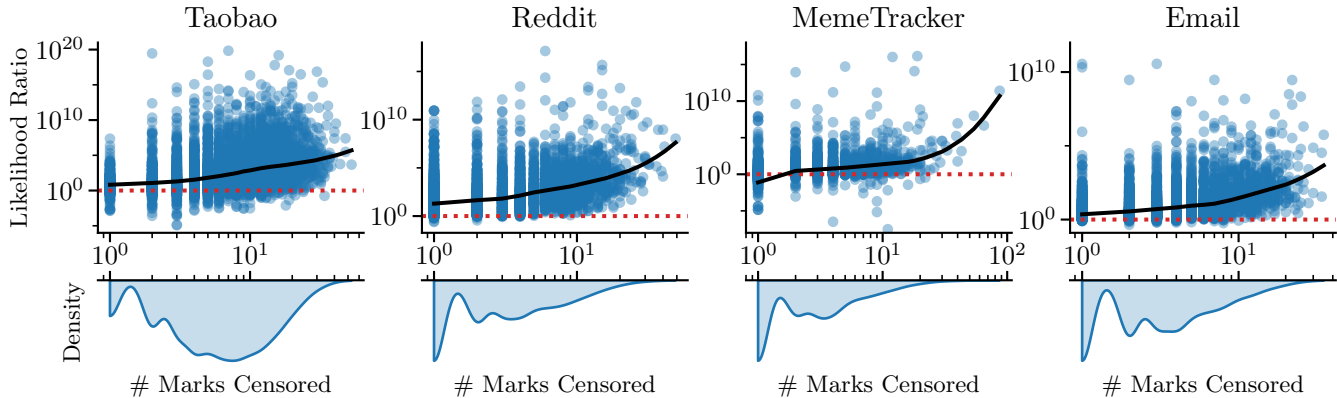

Supplement: supplementary_material [file attachment]

$$M = \{ \text{blue}, \text{orange}, \text{green}, \text{red} \}$$

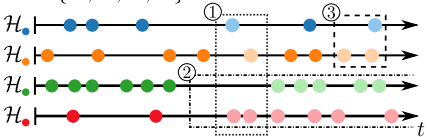

Supplement: supplementary_material [file attachment]

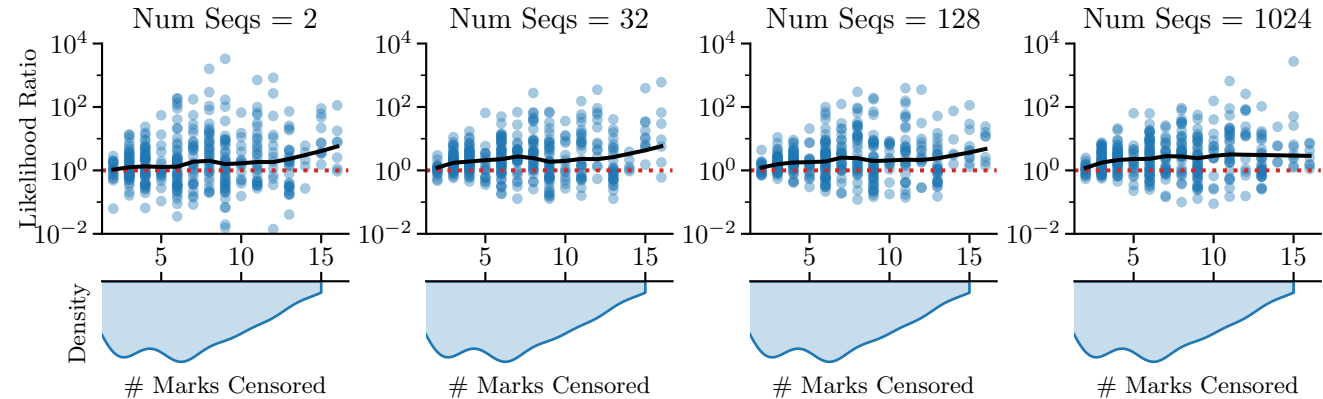

Supplement: supplementary_material [file attachment]

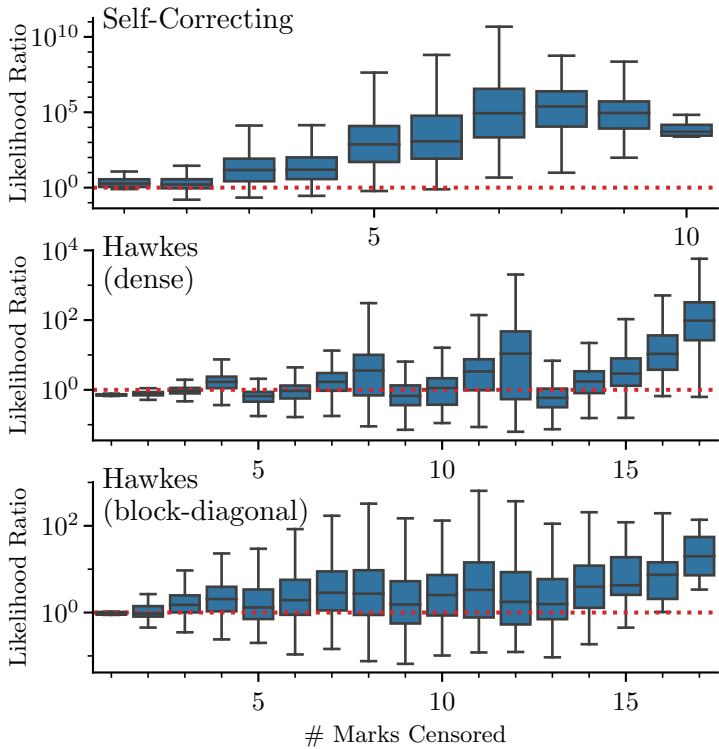

Supplement: supplementary_material [file attachment]

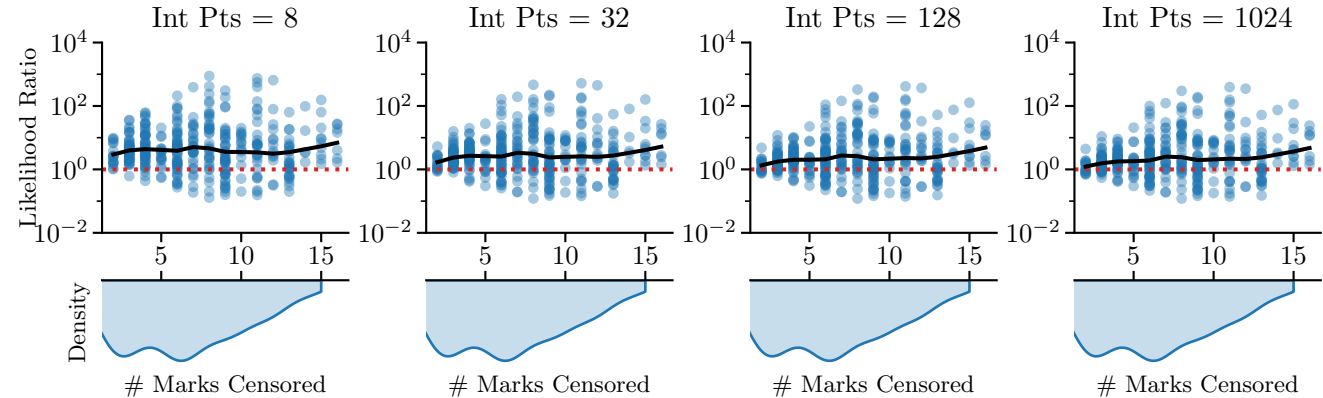

Supplement: supplementary_material [file attachment]

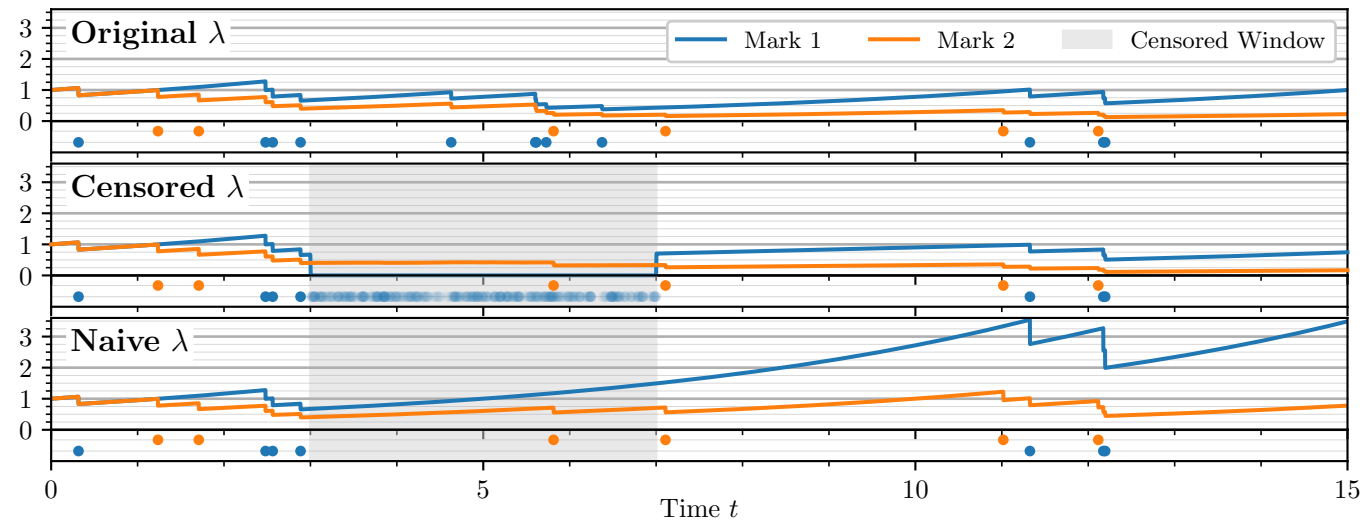

Supplement: supplementary_material [file attachment]

Self-Correcting

Hawkes (dense)

Hawkes (block-diagonal)

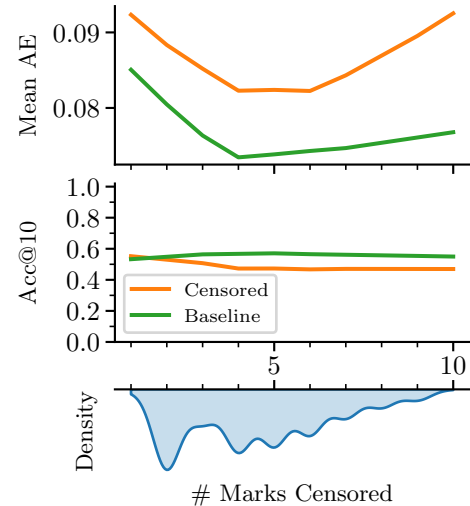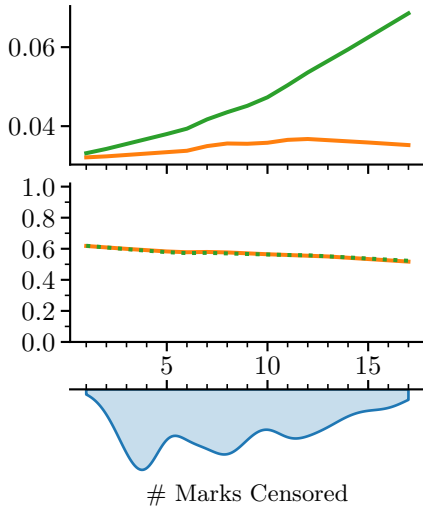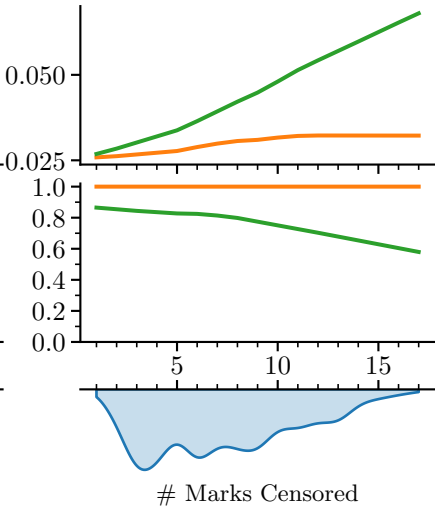

Supplement: supplementary_material [file attachment]

# Hawkes (block-diagonal)

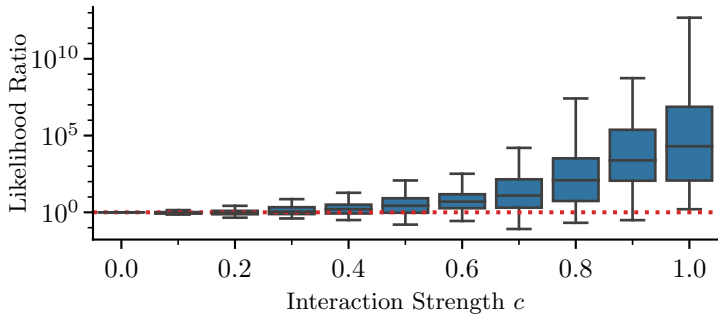

Supplement: supplementary_material [file attachment]

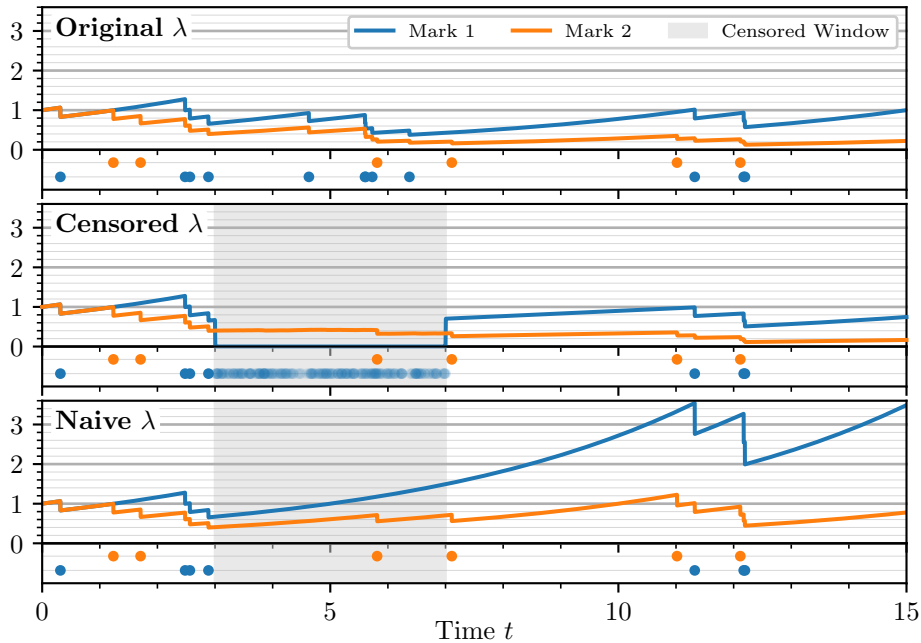

Supplement: supplementary_material [file attachment]

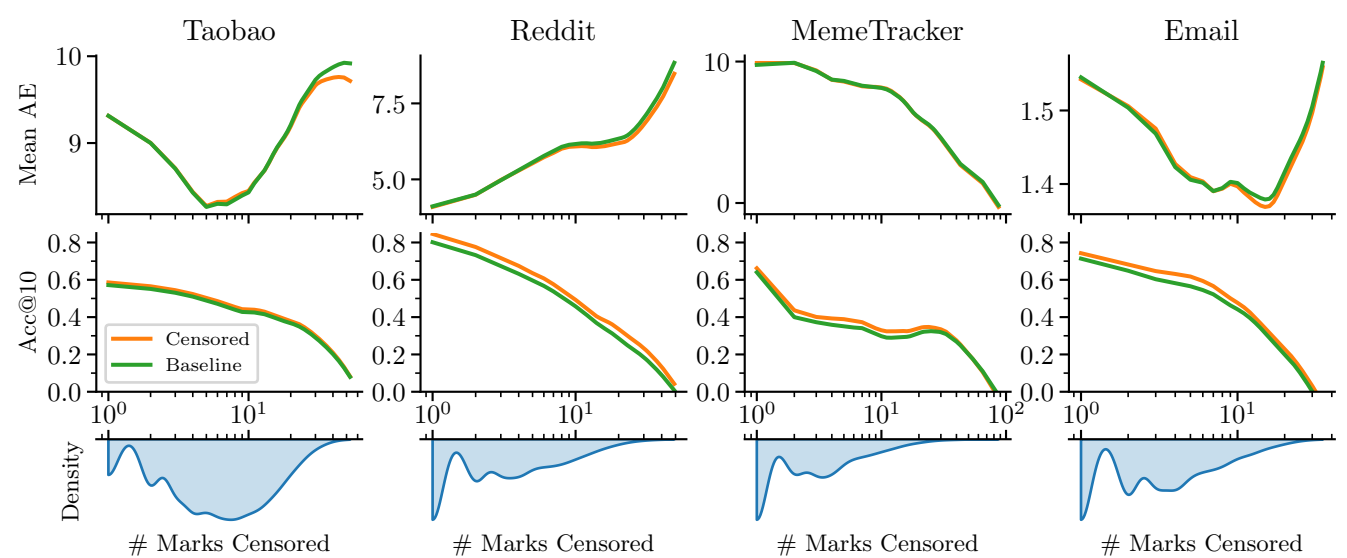

Supplement: supplementary_material [file attachment]
